# Supplementary material for: Cell penetrable peptoid carrier vehicles: synthesis and evaluationElectronic supplementary information (ESI) available: experimental details. See http://www.rsc.org/suppdata/cc/b3/b306438g/
Source: Royal Society of Chemistry journal article supplement (doi:10.1039/b306438g), 2003-01-01
Supplement: b306438g.doc [file b306438g.doc]

**Supplementary Information**

**Cell uptake assays with peptoids 3a-c**

Cells were grown in DMEM medium supplemented with 4 mM glutamine, 10% FCS and 100units/ml penicillin/streptomycin until 80% confluency. Cells were suspended using trypsin/EDTA and counted. Cells were then seeded in 96 well plates at 2x104 cells per well and incubated overnight (or required time period).

Cells were washed with warm PBS buffer. Compounds **3a-3c** were mixed with serum free medium (SFM) to final concentrations of 0.1 M, 1 M, 10 M, and 20 M. To each well 200 l of the various concentrations of **3a-3c** were added and incubated at the required temperature (4C, 20C, 37C) and for the required time period. Each concentration was performed in triplicate. The internalisation of free fluorescein, under the same conditions, was tested simultaneously. After incubation, cells were washed twice with PBS and the cells analysed using fluorescence microscopy and FACS analysis.

**(a)** **(b)**


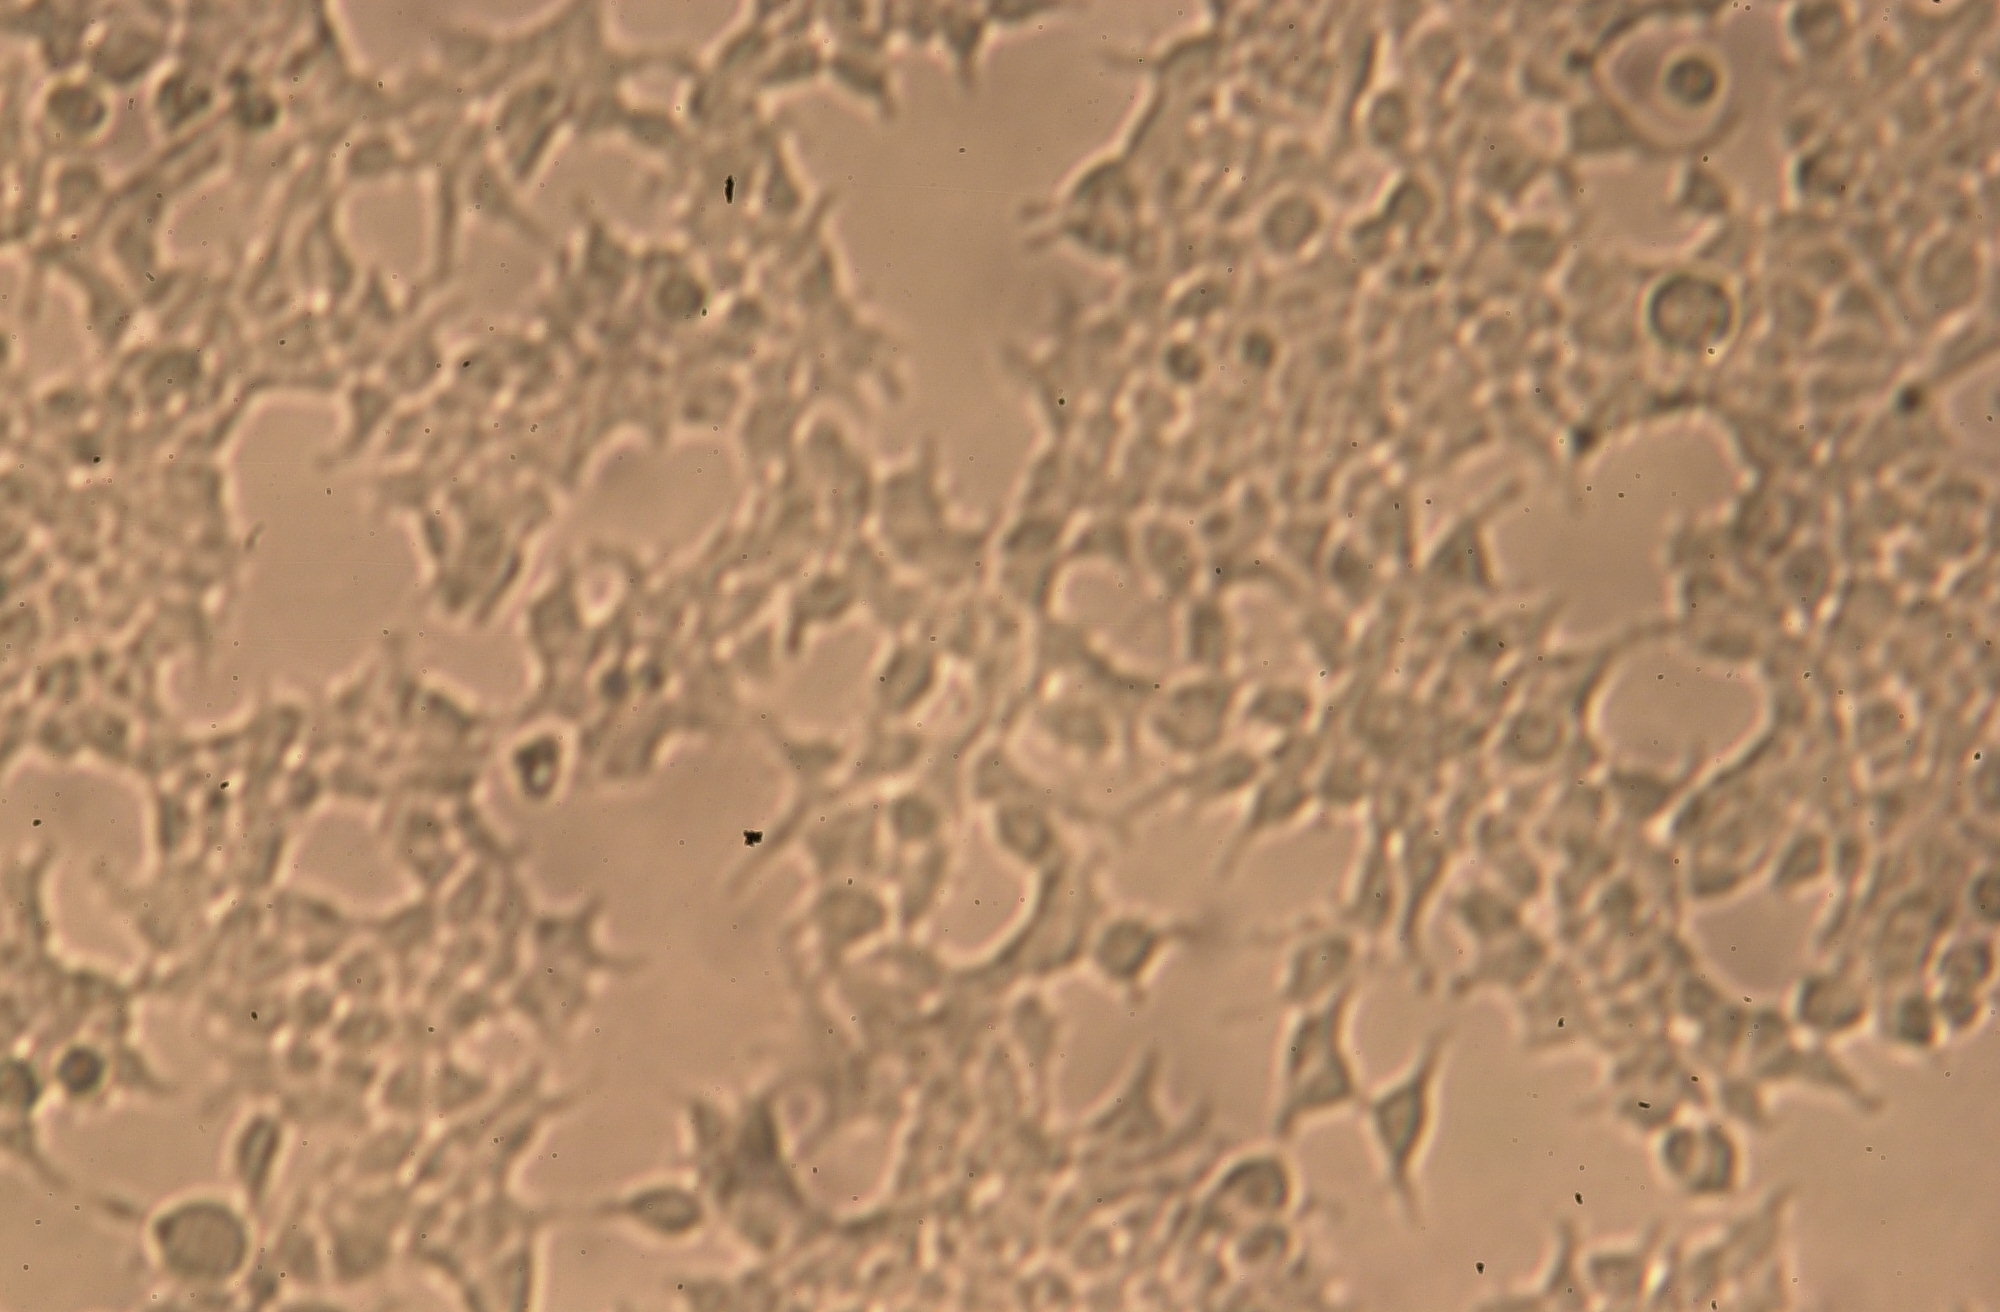

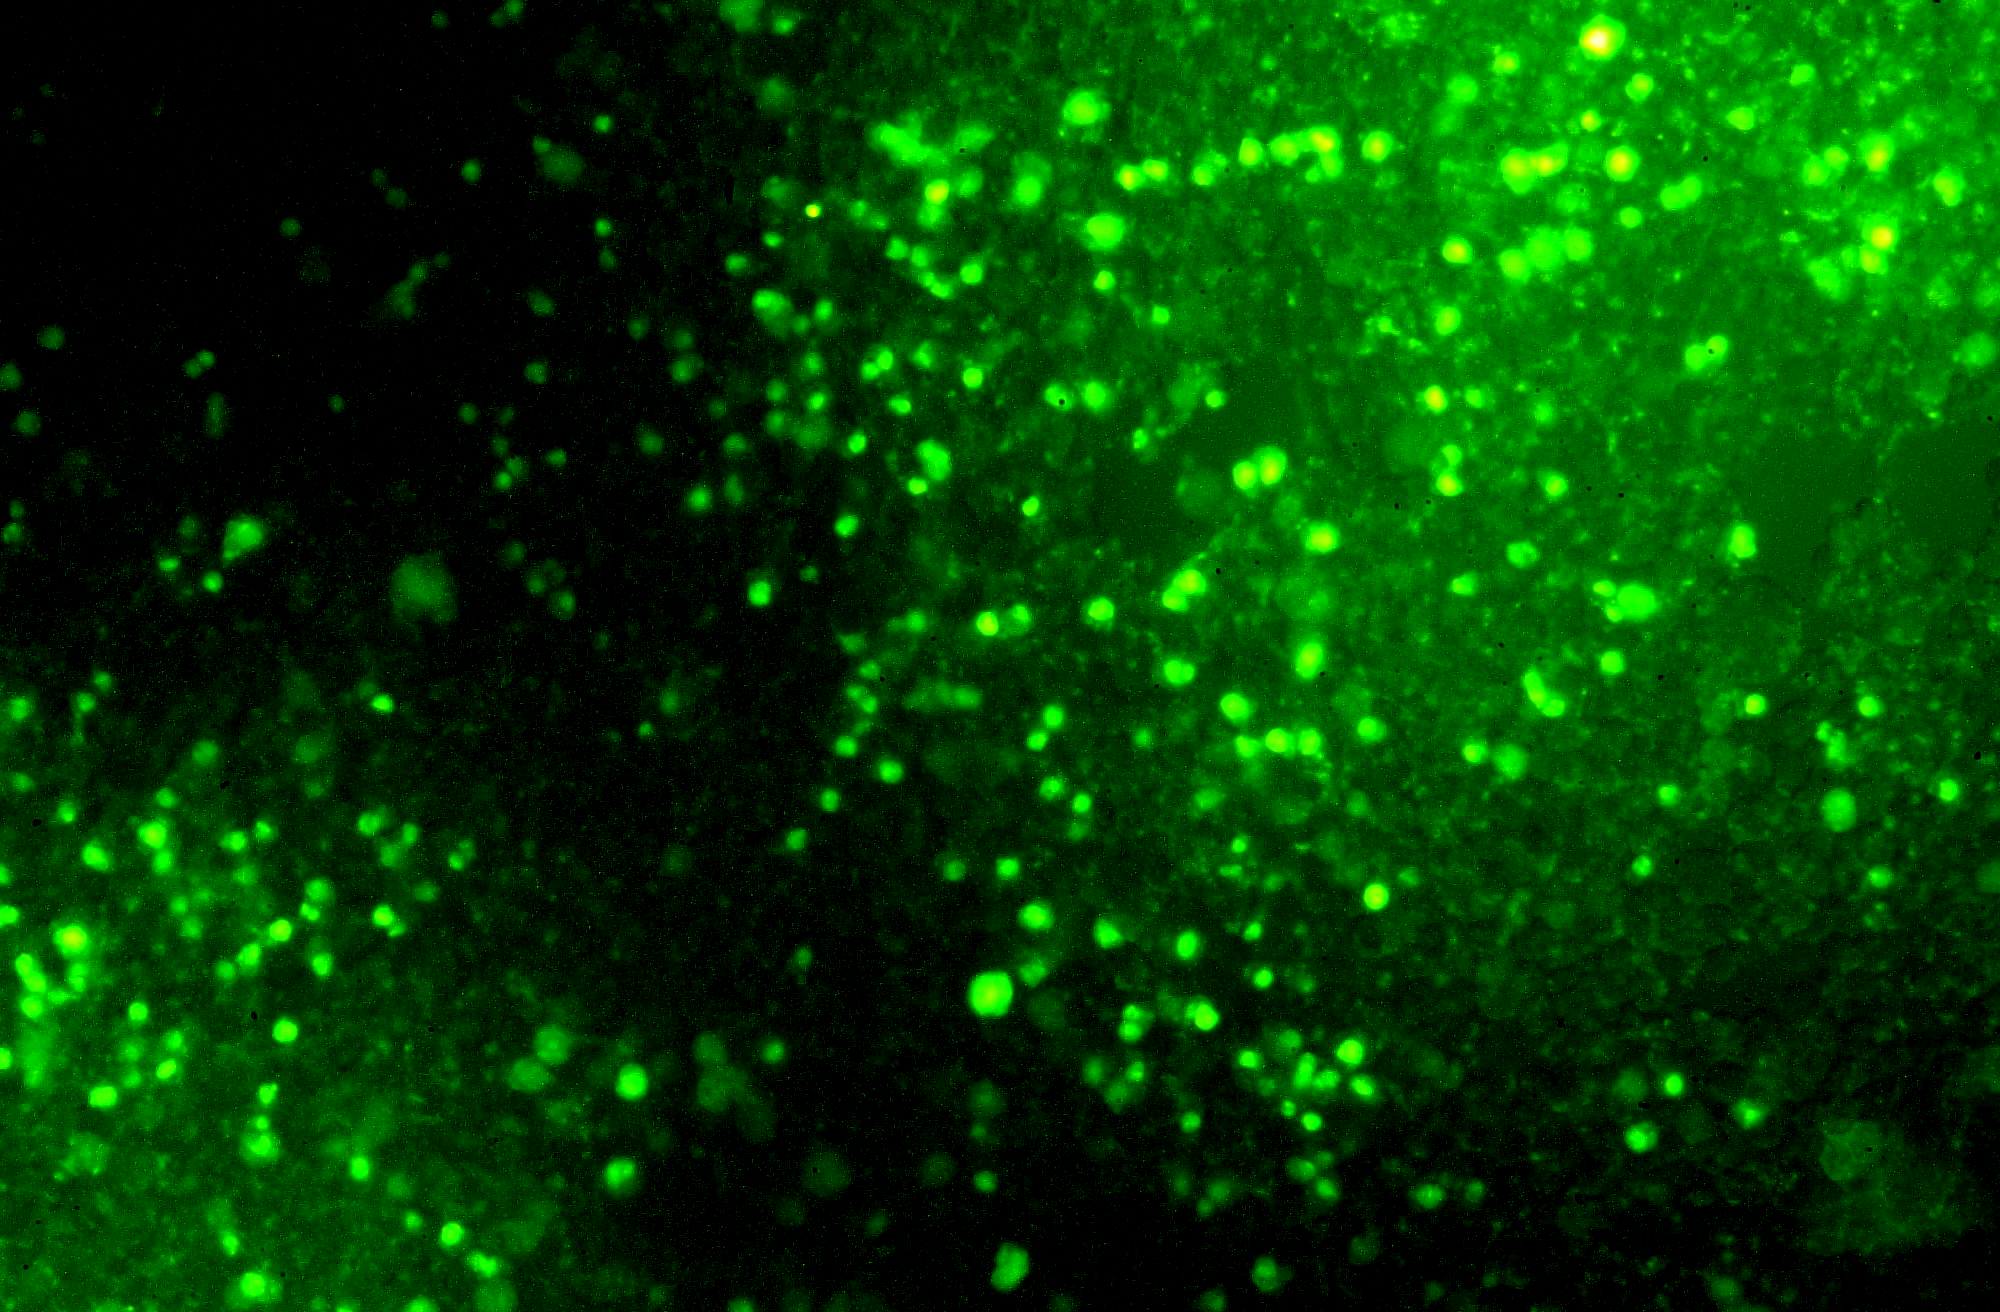


## Figure

## Analysis of cells by fluorescence microscopy

(a) HEK293T (human embryonic kidney) cells, general transmission image at low magnification

(b) **3b** (n = 5) 10M, 37ºC for 6h, fluorescent image at low magnification

# The effect of NaN3 on cellular uptake with peptoids 3a-c

Cells were pre-incubated with 0.5% sodium azide in SFM for 30min. The medium was then removed and 200l of compound **3** (10 m in SFM) in the presence and absence of 0.5% sodium azide was added. The cells were incubated for 4 hours. The cells were fixed and analysed by fluorescence microscopy.
